# Supplementary material
Source: bioRxiv or medRxiv preprint supplement (https://www.biorxiv.org/highwire/filestream/94927/field_highwire_adjunct_files/0/309138-1.pdf)
Supplement: Supplementary file [file 309138-1.pdf]

# Supplemental Information

## Supplemental Figures

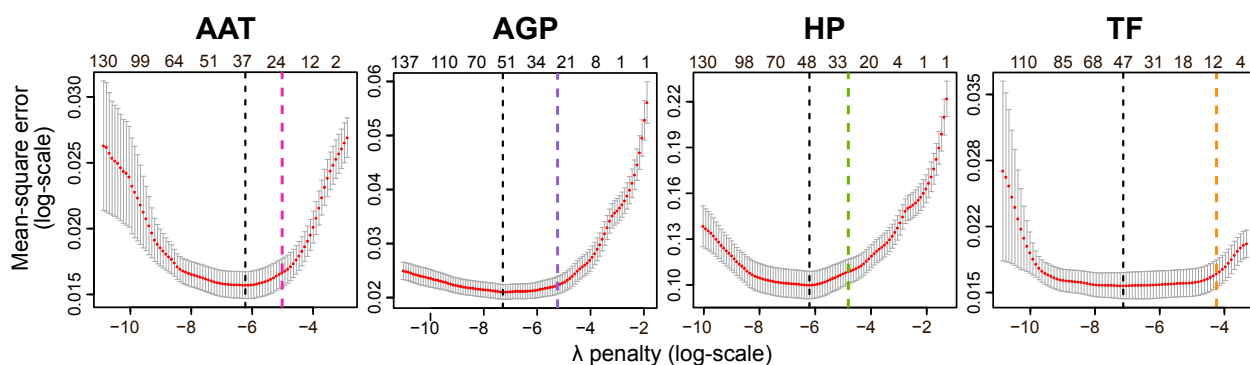

**Figure S1: Glycoprotein imputation model training and selection** in the 615 DILGOM07 participants with complete NMR metabolite measurements and matched glycoprotein data (N=611 for HP). Each plot shows the lasso model tuning in the 10-fold cross validation model training procedure (**Methods**). Grey bars show the range and red points show the average of the mean-square error (MSE) across the 10 test folds for each of the 100 lasso regression  $\lambda$  penalties (x-axes). Numbers on the top axes correspond to the number of features selected for inclusion given the corresponding  $\lambda$  penalty. Age, sex, BMI, and 149 metabolic measures by NMR (**Table S1**) were considered as candidate features for each imputation model. For each glycoprotein, the black dashed line indicates the imputation model with smallest average MSE across the 10 test folds during model training. The coloured dashed line indicates the selected model (detailed in **Table S2**); the simplest model within 1 standard error of the model with the smallest average MSE. Note the MSE cannot be compared between the different glycoproteins since their range of concentrations differ.

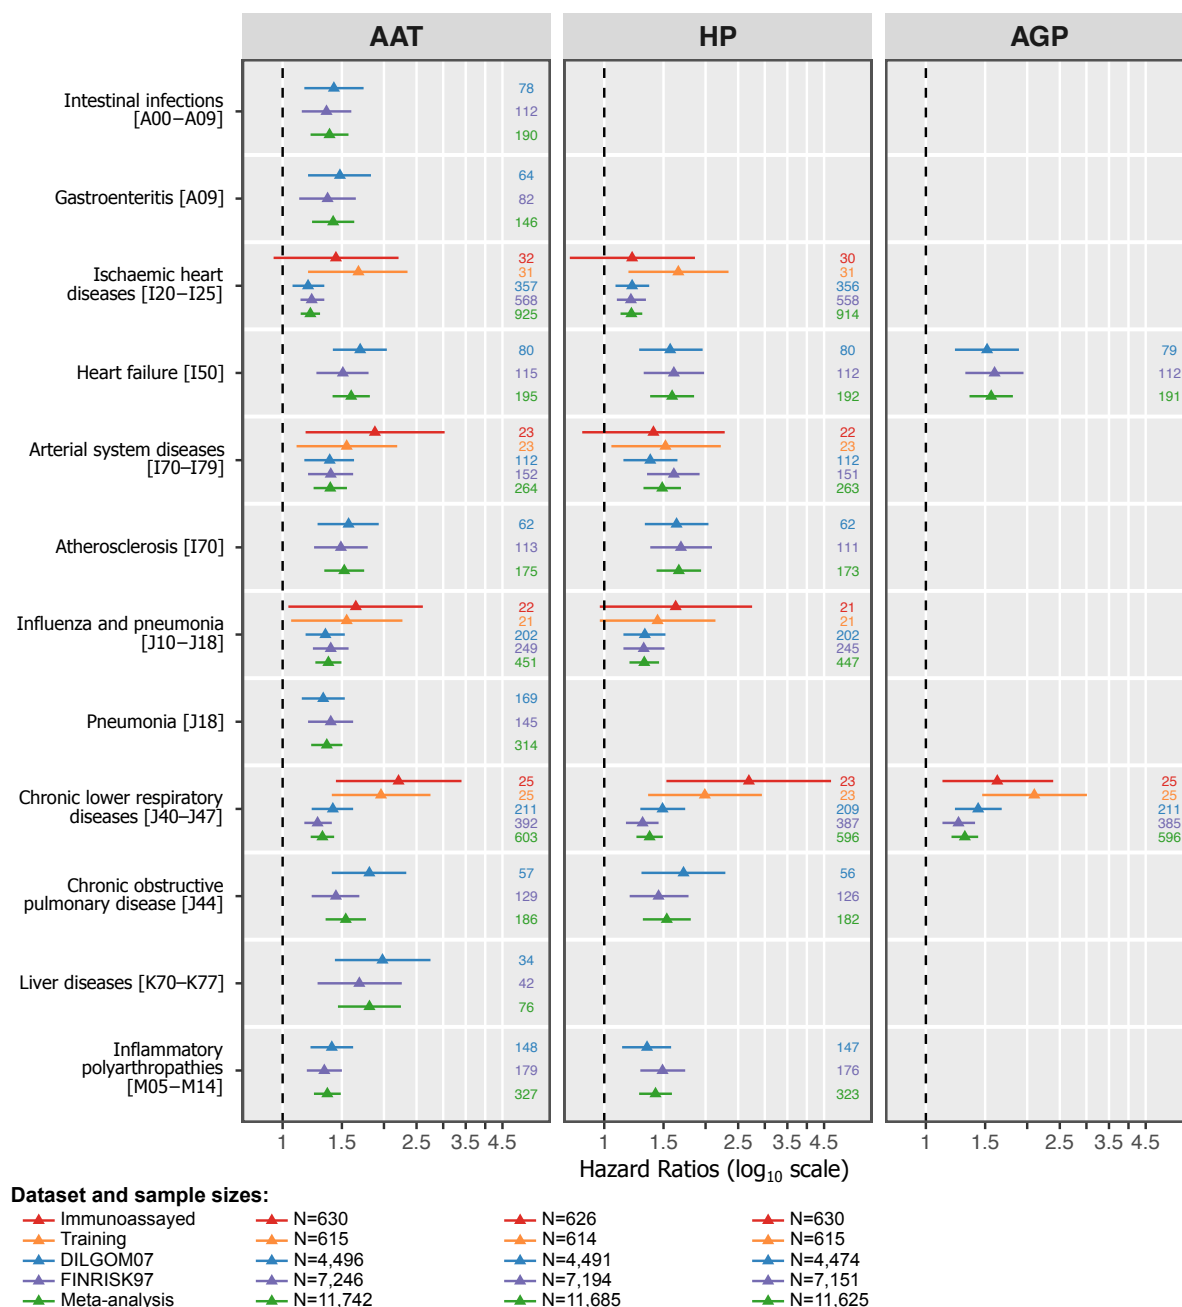

**Figure S2: Forest plots for significant and replicable biomarker associations from Figure 2** comparing hazard ratios from meta-analysis (green) to hazard ratios calculated in each of DILGOM07 (blue) and FINRISK97 (purple) (**Methods**). For comparison, hazard ratios calculated from the immunoassayed glycoprotein concentrations and calculated from the predicted glycoprotein concentrations in the 615 DILGOM07 participants used to train the imputation models (labelled “Training”) are also shown in red and yellow respectively, provided there were >20 incident events in the diagnosis category (**Methods**). The number of incident events for each outcome in each cohort are shown to the right of each hazard ratio. The alphanumeric codes in the square brackets indicate the ICD10 codes or disease categories for each diagnosis. Exact hazard ratios are detailed in **Table S5**.

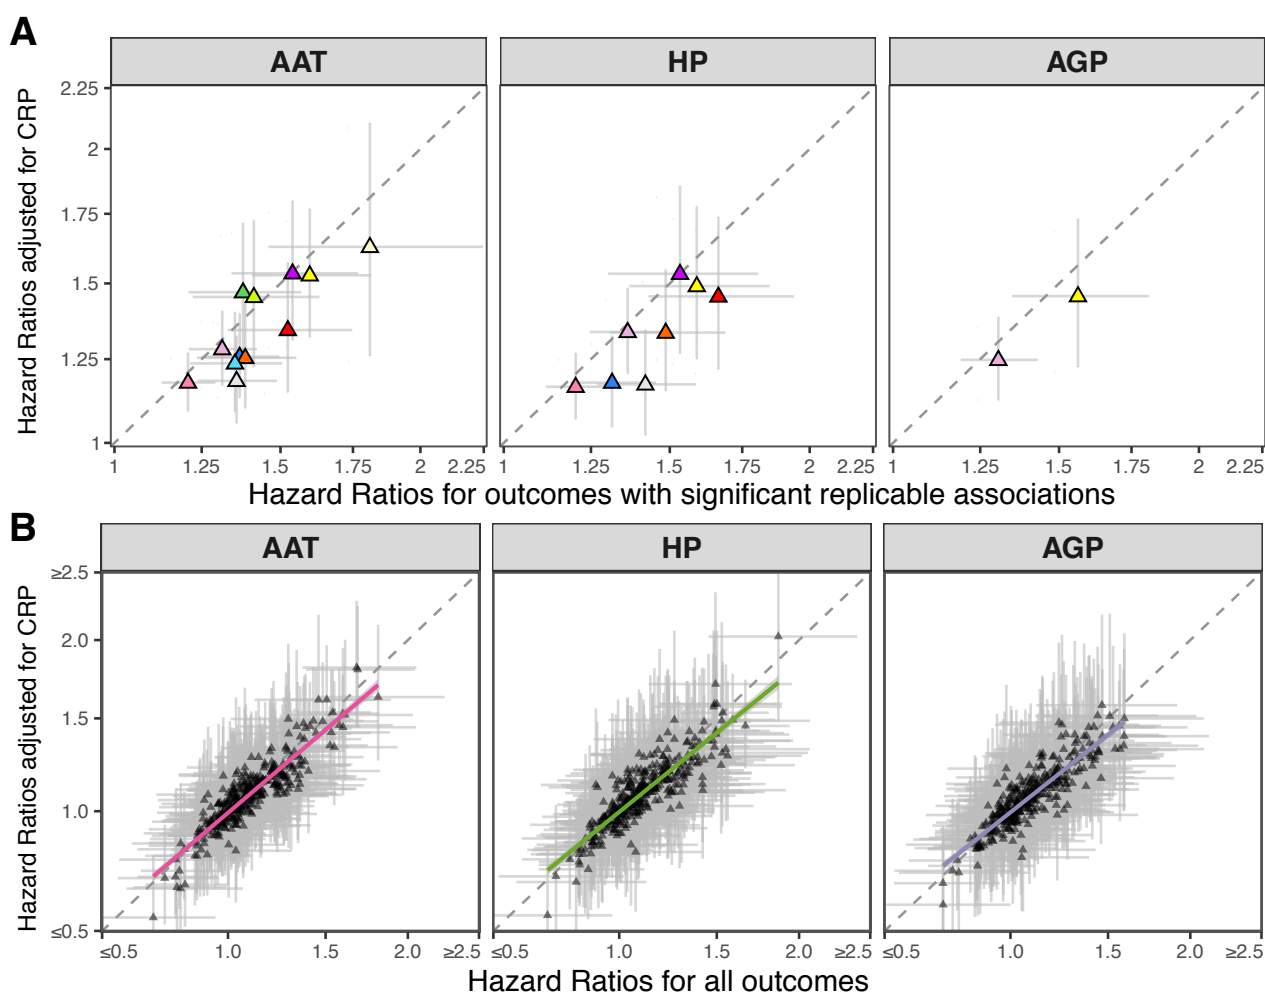

**Significant replicable hazard ratios:**

- |                                      |                                      |                                                |
|--------------------------------------|--------------------------------------|------------------------------------------------|
| ▲ Intestinal infections [A00–A09]    | ▲ Arterial system diseases [I70–I90] | ▲ Chronic lower respiratory diseases [J40–J47] |
| ▲ Gastroenteritis [A09]              | ▲ Atherosclerosis [I70]              | ▲ Chronic obstructive pulmonary disease [J44]  |
| ▲ Ischaemic heart diseases [I20–I25] | ▲ Influenza and pneumonia [J10–J18]  | ▲ Liver diseases [K70–K77]                     |
| ▲ Heart failure [I50]                | ▲ Pneumonia [J18]                    | ▲ Inflammatory polyarthropathies [M05–M14]     |

**Figure S3: Sensitivity analysis of glycoprotein biomarker associations to CRP adjustment for** **A)** outcomes with significant replicable and replicable associations for each biomarker, and **B)** across all outcomes with  $\geq 20$  events in both DILGOM07 and FINRISK97. In both **A)** and **B)** each plot compares the hazard ratios conferred per standard deviation increase of the glycoprotein (x-axes) to hazard ratios conferred per standard deviation increase of the glycoprotein adjusted for CRP (y-axes) in meta-analysis of DILGOM07 and FINRISK97 (**Methods**). Data are shown on a square root scale. The grey dashed diagonal line indicates the location where a hazard ratio would fall if it was unchanged after CRP adjustment. Light grey crosses centred on each hazard ratio represent the 95% confidence intervals for the hazard ratio (horizontal bars) and for the hazard ratio adjusted for CRP (vertical bars). In **A)** hazard ratios are coloured according to the legend. The coloured line in each plot in **B)** shows the line of best fit (linear regression) of the CRP-adjusted hazard ratios on the hazard ratios without CRP adjustment, indicating the overall attenuation by CRP across all outcomes. In **B)** 95% confidence intervals with an upper limit  $\geq 2.5$  or a lower limit  $\leq 0.5$  are truncated on the plot.

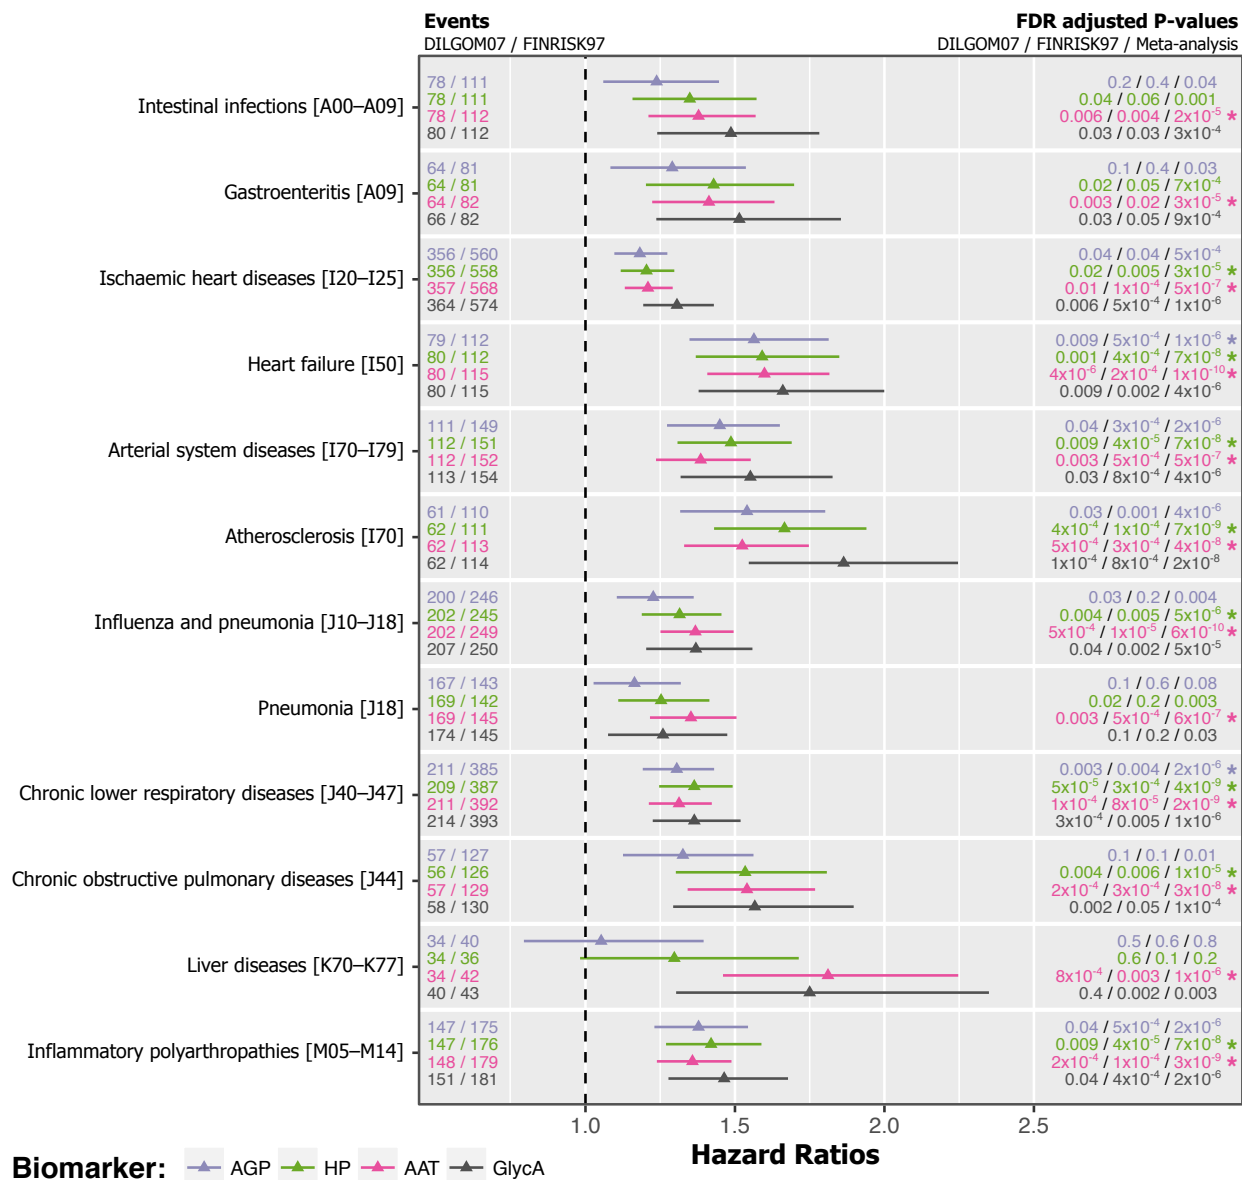

**Figure S4: Comparison of glycoproteins in meta-analysis of DILGOM07 and FINRISK97** for all outcomes for which at least one of AAT, HP, or AGP was a significant and replicable biomarker in **Figure 2**. Triangles indicate Cox proportional hazard ratio estimates for each outcome conferred per standard deviation increase of each biomarker respectively in the meta-analysis (**Methods**). Bars around each hazard ratio indicate the 95% confidence interval. The number of events in DILGOM07 and FINRISK97 are shown to the left of each hazard ratio for each outcome. The Storey-Tibshirani FDR adjusted P-values in DILGOM07, FINRISK97, and meta-analysis are shown to the right of each hazard ratio. A ‘\*’ to the right of the P-values indicates the glycoprotein was a significant and replicable biomarker for that outcome in **Figure 2** (FDR < 0.05/3 in DILGOM07, FINRISK97, and meta-analysis). Alphanumeric codes in the square brackets indicate the ICD-10 codes for each outcome. Hazard ratios are detailed in **Table S7**.

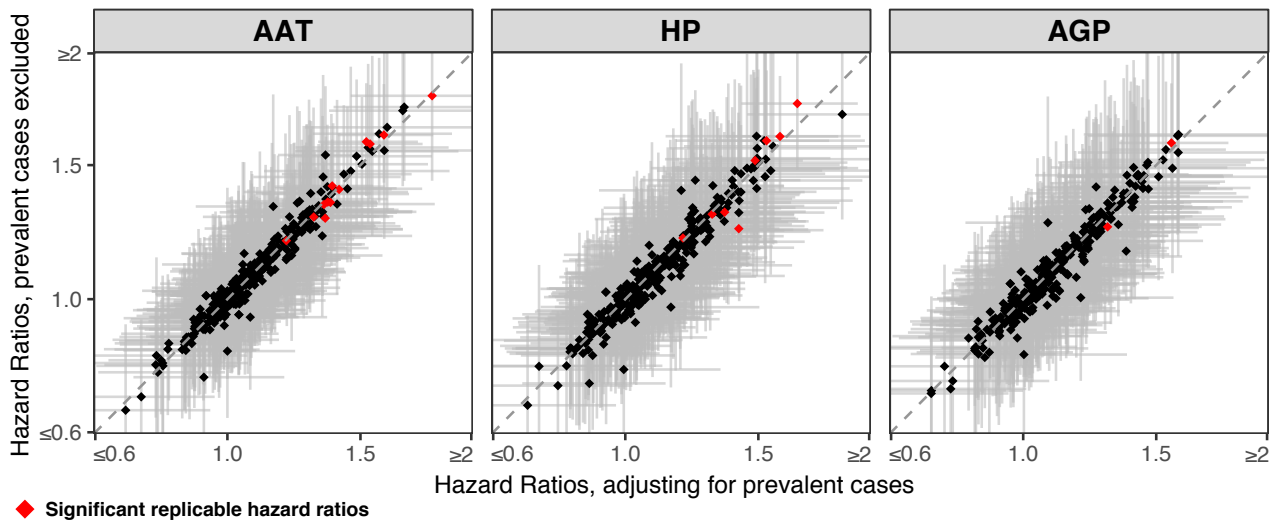

**Figure S5: Sensitivity analysis of glycoprotein biomarker associations to prevalent disease.** Each plot compares the hazard ratios (diamonds) calculated when adjusting for prevalent case status as a covariate (x-axes) to hazard ratios calculated excluding individuals with any prevalent cases for each outcome (y-axes) in meta-analysis of DILGOM07 and FINRISK97. Light grey crosses centred on each hazard ratio represent the 95% confidence intervals for the hazard ratio calculated when adjusting for prevalent cases as a covariate (horizontal bars) and for the hazard ratio calculated excluding prevalent cases of each outcome (vertical bars). The grey dashed diagonal line indicates the location where hazard ratios should fall if their estimates are identical in the different models. Red diamonds indicate outcomes significantly associated with each biomarker in **Figure 2**.

## Supplemental Tables

**Table S1: Serum NMR measurements** that were included as inputs to the lasso regression models used to identify the glycoprotein imputation models. Derived ratios were excluded from the analyses (**Methods**).

| Name                                                                                   | Molecular species                                                      | Units  |
|----------------------------------------------------------------------------------------|------------------------------------------------------------------------|--------|
| <b>Lipoprotein particles and their constituents</b>                                    |                                                                        |        |
| <i>Chylomicrons and very low density lipoprotein (VLDL) particles</i>                  |                                                                        |        |
| VLDL-D                                                                                 | Mean diameter for VLDL particles                                       | nm     |
| VLDL-C                                                                                 | Total cholesterol in VLDL                                              | mmol/l |
| VLDL-TG                                                                                | Triglycerides in VLDL                                                  | mmol/l |
| <i>Low density lipoprotein (LDL) particles</i>                                         |                                                                        |        |
| LDL-D                                                                                  | Mean diameter for LDL particles                                        | nm     |
| LDL-C                                                                                  | Total cholesterol in LDL                                               | mmol/l |
| LDL-TG                                                                                 | Triglycerides in LDL                                                   | mmol/l |
| <i>High density lipoprotein (HDL) particles</i>                                        |                                                                        |        |
| HDL-D                                                                                  | Mean diameter for HDL particles                                        | nm     |
| HDL-C                                                                                  | Total cholesterol in HDL                                               | mmol/l |
| HDL-TG                                                                                 | Triglycerides in HDL                                                   | mmol/l |
| <b>Lipoprotein subclasses and their constituents</b>                                   |                                                                        |        |
| <i>Chylomicrons and extremely large VLDL particles (particle diameters &gt; 75 nm)</i> |                                                                        |        |
| XXL-VLDL-P                                                                             | Total concentration of chylomicrons and extremely large VLDL particles | mol/l  |
| XXL-VLDL-L                                                                             | Total lipids in chylomicrons and extremely large VLDL                  | mmol/l |
| XXL-VLDL-PL                                                                            | Phospholipids in chylomicrons and extremely large VLDL                 | mmol/l |
| XXL-VLDL-C                                                                             | Total cholesterol in chylomicrons and extremely large VLDL             | mmol/l |
| XXL-VLDL-CE                                                                            | Cholesterol esters in chylomicrons and extremely large VLDL            | mmol/l |
| XXL-VLDL-FC                                                                            | Free cholesterol in chylomicrons and extremely large VLDL              | mmol/l |
| XXL-VLDL-TG                                                                            | Triglycerides in chylomicrons and extremely large VLDL                 | mmol/l |
| <i>Very large VLDL particles (average particle diameter of 64 nm)</i>                  |                                                                        |        |
| XL-VLDL-P                                                                              | Total concentration of very large VLDL particles                       | mol/l  |
| XL-VLDL-L                                                                              | Total lipids in very large VLDL                                        | mmol/l |
| XL-VLDL-PL                                                                             | Phospholipids in very large VLDL                                       | mmol/l |
| XL-VLDL-C                                                                              | Total cholesterol in very large VLDL                                   | mmol/l |
| XL-VLDL-CE                                                                             | Cholesterol esters in very large VLDL                                  | mmol/l |
| XL-VLDL-FC                                                                             | Free cholesterol in very large VLDL                                    | mmol/l |
| XL-VLDL-TG                                                                             | Triglycerides in very large VLDL                                       | mmol/l |
| <i>Large VLDL particles (average particle diameter of 53.6 nm)</i>                     |                                                                        |        |
| L-VLDL-P                                                                               | Total concentration of large VLDL particles                            | mol/l  |
| L-VLDL-L                                                                               | Total lipids in large VLDL                                             | mmol/l |
| L-VLDL-PL                                                                              | Phospholipids in large VLDL                                            | mmol/l |
| L-VLDL-C                                                                               | Total cholesterol in large VLDL                                        | mmol/l |
| L-VLDL-CE                                                                              | Cholesterol esters in large VLDL                                       | mmol/l |
| L-VLDL-FC                                                                              | Free cholesterol in large VLDL                                         | mmol/l |
| L-VLDL-TG                                                                              | Triglycerides in large VLDL                                            | mmol/l |
| <i>Medium VLDL particles (average particle diameter of 44.5 nm)</i>                    |                                                                        |        |
| M-VLDL-P                                                                               | Total concentration of medium VLDL particles                           | mol/l  |
| M-VLDL-L                                                                               | Total lipids in medium VLDL                                            | mmol/l |
| M-VLDL-PL                                                                              | Phospholipids in medium VLDL                                           | mmol/l |
| M-VLDL-C                                                                               | Total cholesterol in medium VLDL                                       | mmol/l |
| M-VLDL-CE                                                                              | Cholesterol esters in medium VLDL                                      | mmol/l |
| M-VLDL-FC                                                                              | Free cholesterol in medium VLDL                                        | mmol/l |
| M-VLDL-TG                                                                              | Triglycerides in medium VLDL                                           | mmol/l |
| <i>Small VLDL particles (average particle diameter of 36.8 nm)</i>                     |                                                                        |        |
| S-VLDL-P                                                                               | Total concentration of small VLDL particles                            | mol/l  |
| S-VLDL-L                                                                               | Total lipids in small VLDL                                             | mmol/l |
| S-VLDL-PL                                                                              | Phospholipids in small VLDL                                            | mmol/l |
| S-VLDL-C                                                                               | Total cholesterol in small VLDL                                        | mmol/l |
| S-VLDL-CE                                                                              | Cholesterol esters in small VLDL                                       | mmol/l |
| S-VLDL-FC                                                                              | Free cholesterol in small VLDL                                         | mmol/l |

| Name                                                                                     | Molecular species                                | Units  |
|------------------------------------------------------------------------------------------|--------------------------------------------------|--------|
| <b>Lipoprotein subclasses and their constituents (continued)</b>                         |                                                  |        |
| <i>Small VLDL particles (average particle diameter of 36.8 nm) (continued)</i>           |                                                  |        |
| S-VLDL-TG                                                                                | Triglycerides in small VLDL                      | mmol/l |
| <i>Very small VLDL particles (average particle diameter of 31.3 nm)</i>                  |                                                  |        |
| XS-VLDL-P                                                                                | Total concentration of very small VLDL particles | mol/l  |
| XS-VLDL-L                                                                                | Total lipids in very small VLDL                  | mmol/l |
| XS-VLDL-PL                                                                               | Phospholipids in very small VLDL                 | mmol/l |
| XS-VLDL-C                                                                                | Total cholesterol in very small VLDL             | mmol/l |
| XS-VLDL-CE                                                                               | Cholesterol esters in very small VLDL            | mmol/l |
| XS-VLDL-FC                                                                               | Free cholesterol in very small VLDL              | mmol/l |
| XS-VLDL-TG                                                                               | Triglycerides in very small VLDL                 | mmol/l |
| <i>Intermediate density lipoprotein particles (average particle diameter of 28.6 nm)</i> |                                                  |        |
| IDL-P                                                                                    | Total concentration of IDL particles             | mol/l  |
| IDL-L                                                                                    | Total lipids in IDL                              | mmol/l |
| IDL-PL                                                                                   | Phospholipids in IDL                             | mmol/l |
| IDL-C                                                                                    | Total cholesterol in IDL                         | mmol/l |
| IDL-CE                                                                                   | Cholesterol esters in IDL                        | mmol/l |
| IDL-FC                                                                                   | Free cholesterol in IDL                          | mmol/l |
| IDL-TG                                                                                   | Triglycerides in IDL                             | mmol/l |
| <i>Large LDL particles (average particle diameter of 25.5 nm)</i>                        |                                                  |        |
| L-LDL-P                                                                                  | Total concentration of large LDL particles       | mol/l  |
| L-LDL-L                                                                                  | Total lipids in large LDL                        | mmol/l |
| L-LDL-PL                                                                                 | Phospholipids in large LDL                       | mmol/l |
| L-LDL-C                                                                                  | Total cholesterol in large LDL                   | mmol/l |
| L-LDL-CE                                                                                 | Cholesterol esters in large LDL                  | mmol/l |
| L-LDL-FC                                                                                 | Free cholesterol in large LDL                    | mmol/l |
| L-LDL-TG                                                                                 | Triglycerides in large LDL                       | mmol/l |
| <i>Medium LDL particles (average particle diameter of 23.0 nm)</i>                       |                                                  |        |
| M-LDL-P                                                                                  | Total concentration of medium LDL particles      | mol/l  |
| M-LDL-L                                                                                  | Total lipids in medium LDL                       | mmol/l |
| M-LDL-PL                                                                                 | Phospholipids in medium LDL                      | mmol/l |
| M-LDL-C                                                                                  | Total cholesterol in medium LDL                  | mmol/l |
| M-LDL-CE                                                                                 | Cholesterol esters in medium LDL                 | mmol/l |
| M-LDL-FC                                                                                 | Free cholesterol in medium LDL                   | mmol/l |
| M-LDL-TG                                                                                 | Triglycerides in medium LDL                      | mmol/l |
| <i>Small LDL particles (average particle diameter of 18.7 nm)</i>                        |                                                  |        |
| S-LDL-P                                                                                  | Total concentration of small LDL particles       | mol/l  |
| S-LDL-L                                                                                  | Total lipids in small LDL                        | mmol/l |
| S-LDL-PL                                                                                 | Phospholipids in small LDL                       | mmol/l |
| S-LDL-C                                                                                  | Total cholesterol in small LDL                   | mmol/l |
| S-LDL-CE                                                                                 | Cholesterol esters in small LDL                  | mmol/l |
| S-LDL-FC                                                                                 | Free cholesterol in small LDL                    | mmol/l |
| S-LDL-TG                                                                                 | Triglycerides in small LDL                       | mmol/l |
| <i>Very large HDL particles (average particle diameter of 14.3 nm)</i>                   |                                                  |        |
| XL-HDL-P                                                                                 | Total concentration of very large HDL particles  | mol/l  |
| XL-HDL-L                                                                                 | Total lipids in very large HDL                   | mmol/l |
| XL-HDL-PL                                                                                | Phospholipids in very large HDL                  | mmol/l |
| XL-HDL-C                                                                                 | Total cholesterol in very large HDL              | mmol/l |
| XL-HDL-CE                                                                                | Cholesterol esters in very large HDL             | mmol/l |
| XL-HDL-FC                                                                                | Free cholesterol in very large HDL               | mmol/l |
| XL-HDL-TG                                                                                | Triglycerides in very large HDL                  | mmol/l |
| <i>Large HDL particles (average particle diameter of 12.1 nm)</i>                        |                                                  |        |
| L-HDL-P                                                                                  | Total concentration of large HDL particles       | mol/l  |
| L-HDL-L                                                                                  | Total lipids in large HDL                        | mmol/l |
| L-HDL-PL                                                                                 | Phospholipids in large HDL                       | mmol/l |
| L-HDL-C                                                                                  | Total cholesterol in large HDL                   | mmol/l |
| L-HDL-CE                                                                                 | Cholesterol esters in large HDL                  | mmol/l |
| L-HDL-FC                                                                                 | Free cholesterol in large HDL                    | mmol/l |
| L-HDL-TG                                                                                 | Triglycerides in large HDL                       | mmol/l |

| Name                                                               | Molecular species                                   | Units  |
|--------------------------------------------------------------------|-----------------------------------------------------|--------|
| <b>Lipoprotein subclasses and their constituents (continued)</b>   |                                                     |        |
| <i>Medium HDL particles (average particle diameter of 10.9 nm)</i> |                                                     |        |
| M-HDL-P                                                            | Concentration of medium HDL particles               | mol/l  |
| M-HDL-L                                                            | Total lipids in medium HDL                          | mmol/l |
| M-HDL-PL                                                           | Phospholipids in medium HDL                         | mmol/l |
| M-HDL-C                                                            | Total cholesterol in medium HDL                     | mmol/l |
| M-HDL-CE                                                           | Cholesterol esters in medium HDL                    | mmol/l |
| M-HDL-FC                                                           | Free cholesterol in medium HDL                      | mmol/l |
| M-HDL-TG                                                           | Triglycerides in medium HDL                         | mmol/l |
| <i>Small HDL particles (average particle diameter of 8.7 nm)</i>   |                                                     |        |
| S-HDL-P                                                            | Concentration of small HDL particles                | mol/l  |
| S-HDL-L                                                            | Total lipids in small HDL                           | mmol/l |
| S-HDL-PL                                                           | Phospholipids in small HDL                          | mmol/l |
| S-HDL-C                                                            | Total cholesterol in small HDL                      | mmol/l |
| S-HDL-CE                                                           | Cholesterol esters in small HDL                     | mmol/l |
| S-HDL-FC                                                           | Free cholesterol in small HDL                       | mmol/l |
| S-HDL-TG                                                           | Triglycerides in small HDL                          | mmol/l |
| <i>HDL<sub>2</sub> fraction (1.063–1.125 g/mL)</i>                 |                                                     |        |
| HDL2-C                                                             | Cholesterol in the HDL <sub>2</sub> fraction        | mmol/l |
| <i>HDL<sub>3</sub> fraction (1.125–1.210 g/mL)</i>                 |                                                     |        |
| HDL3-C                                                             | Cholesterol in the HDL <sub>3</sub> fraction        | mmol/l |
| <b>Cholesterol</b>                                                 |                                                     |        |
| Serum-C                                                            | Total cholesterol in serum                          | mmol/l |
| EstC                                                               | Esterified cholesterol                              | mmol/l |
| FreeC                                                              | Free cholesterol                                    | mmol/l |
| Remnant-C                                                          | Remnant cholesterol (non-HDL, non-LDL -cholesterol) | mmol/l |
| <b>Glycerides and phospholipids</b>                                |                                                     |        |
| Serum-TG                                                           | Total triglycerides in serum                        | mmol/l |
| TotPG                                                              | Total phosphoglycerides                             | mmol/l |
| PC                                                                 | Phosphatidylcholine and other cholines              | mmol/l |
| SM                                                                 | Sphingomyelins                                      | mmol/l |
| TotCho                                                             | Total cholines                                      | mmol/l |
| <b>Apolipoproteins</b>                                             |                                                     |        |
| ApoA1                                                              | Apolipoprotein A-I                                  | g/l    |
| ApoB                                                               | Apolipoprotein B                                    | g/l    |
| <b>Fatty acids and saturation</b>                                  |                                                     |        |
| TotFA                                                              | Total fatty acids                                   | mmol/l |
| UnSat                                                              | Estimated degree of fatty acid unsaturation         | %      |
| FAw3                                                               | Omega-3 fatty acids                                 | mmol/l |
| FAw6                                                               | Omega-6 fatty acids                                 | mmol/l |
| PUFA                                                               | Polyunsaturated fatty acids                         | mmol/l |
| MUFA                                                               | Monounsaturated fatty acids; 16:1, 18:1             | mmol/l |
| SFA                                                                | Saturated fatty acids                               | mmol/l |
| DHA                                                                | Docosahexaenoic acid; 22:6                          | mmol/l |
| LA                                                                 | Linoleic acid; 18:2                                 | mmol/l |
| <b>Amino acids</b>                                                 |                                                     |        |
| Ala                                                                | Alanine                                             | mmol/l |
| Gln                                                                | Glutamine                                           | mmol/l |
| Gly                                                                | Glycine                                             | mmol/l |
| His                                                                | Histidine                                           | mmol/l |
| Ile                                                                | Isoleucine                                          | mmol/l |
| Leu                                                                | Leucine                                             | mmol/l |
| Val                                                                | Valine                                              | mmol/l |
| Phe                                                                | Phenylalanine                                       | mmol/l |
| Tyr                                                                | Tyrosine                                            | mmol/l |
| <b>Glycolysis related metabolites</b>                              |                                                     |        |
| Glc                                                                | Glucose                                             | mmol/l |
| Lac                                                                | Lactate                                             | mmol/l |
| Pyr                                                                | Pyruvate                                            | mmol/l |
| Cit                                                                | Citrate                                             | mmol/l |



| <b>Name</b>                                       | <b>Molecular species</b>                           | <b>Units</b> |
|---------------------------------------------------|----------------------------------------------------|--------------|
| <b>Glycolysis related metabolites (continued)</b> |                                                    |              |
| Glol                                              | Glycerol                                           | mmol/l       |
| <b>Ketone bodies</b>                              |                                                    |              |
| Ace                                               | Acetate                                            | mmol/l       |
| AcAce                                             | Acetoacetate                                       | mmol/l       |
| bOHBut                                            | 3-hydroxybutyrate                                  | mmol/l       |
| <b>Fluid balance</b>                              |                                                    |              |
| Crea                                              | Creatinine                                         | mmol/l       |
| Alb                                               | Albumin                                            | signal area  |
| <b>Inflammation</b>                               |                                                    |              |
| GlycA                                             | Glycoprotein <i>N</i> -linked glycan methyl groups | mmol/l       |

**Table S2: Summary of imputation models for AAT, AGP, HP, and TF. A)** Here, coefficients are rounded to two significant figures. Full precision models are made available through the *imputeGP* R package (**Methods**). Each model predicts the concentration of each glycoprotein on a natural logarithm scale. Concentrations in mg/L are obtained by exponentiating the result. Variables in the imputation models are also required on a natural logarithm scale, with the exceptions of participant Age and Sex. The coding for the Sex variable was 1 for men and 2 for women. The NMR-metabolite measures are described in **Table S1. B)** Model coefficients are given after log transformation of each variable and standardisation to their mean and standard deviation in DILGOM07, *i.e.* coefficients indicate relative contribution to determining the concentration of the glycoprotein. Variables are listed from left to right in descending order of their relative contribution in both **A)** and **B)**.

**A)**

|            |                                                                                                                                                                                                                                                                                                                                                                                                                                                                                                                                                                                               |
|------------|-----------------------------------------------------------------------------------------------------------------------------------------------------------------------------------------------------------------------------------------------------------------------------------------------------------------------------------------------------------------------------------------------------------------------------------------------------------------------------------------------------------------------------------------------------------------------------------------------|
| <i>AAT</i> | = - 11 + 0.68 <i>GlycA</i> - 0.094 <i>FAw3</i> - 0.8 <i>VLDL-D</i> + 0.37 <i>HDL3-C</i> + 4.2 <i>LDL-D</i> + 0.14 <i>Phe</i> - 0.08 <i>Leu</i><br>- 0.064 <i>ApoB</i> - 0.19 <i>Alb</i> - 0.045 <i>Tyr</i> + 0.019 <i>boHBut</i> - 0.045 <i>BMI</i> - 0.043 <i>Ala</i> + 0.011 <i>L-HDL-TG</i><br>- 0.022 <i>Ile</i> - 0.025 <i>Ace</i> - 0.038 <i>His</i> + 0.0024 <i>HDL-TG</i>                                                                                                                                                                                                             |
| <i>AGP</i> | = 5.7 + 1.7 <i>GlycA</i> - 0.34 <i>TotFA</i> + 0.22 <i>IDL-FC</i> + 0.043 <i>L-HDL-FC</i> - 0.22 <i>His</i> - 0.092 <i>HDL-TG</i><br>+ 0.11 <i>BMI</i> - 0.16 <i>S-HDL-FC</i> - 0.057 <i>S-LDL-TG</i> - 0.023 <i>boHBut</i> - 0.062 <i>LA</i> + 0.066 <i>S-HDL-CE</i><br>- 0.055 <i>Lac</i> - 0.021 <i>S-VLDL-TG</i> - 0.042 <i>Ace</i> - 0.052 <i>Cit</i> - 0.038 <i>SFA</i> - 0.049 <i>Ala</i><br>+ 0.0013 <i>XXL-VLDL-CE</i> + 0.014 <i>Glol</i> + 0.00017 <i>Age</i> + 0.0084 <i>Crea</i> + 0.0061 <i>Gly</i>                                                                             |
| <i>HP</i>  | = 0.53 + 3.0 <i>GlycA</i> - 0.82 <i>LA</i> + 0.36 <i>IDL-FC</i> + 0.48 <i>SM</i> - 0.26 <i>FAw3</i> - 0.29 <i>HDL-TG</i> - 0.068 <i>S-VLDL-CE</i><br>+ 0.003 <i>Age</i> - 0.75 <i>Alb</i> - 0.13 <i>Ile</i> - 0.24 <i>Cit</i> - 0.89 <i>VLDL-D</i> - 0.13 <i>Leu</i> + 0.13 <i>Val</i><br>+ 0.0066 <i>L-VLDL-CE</i> + 0.084 <i>Pyr</i> - 0.084 <i>Lac</i> - 0.094 <i>Gln</i> + 0.042 <i>M-HDL-FC</i> - 0.011 <i>XL-HDL-TG</i><br>+ 0.0089 <i>XL-HDL-PL</i> - 0.048 <i>His</i> - 0.026 <i>Tyr</i> - 0.024 <i>BMI</i> - 0.0037 <i>L-HDL-TG</i> - 0.004 <i>PUFA</i><br>+ 0.00056 <i>S-LDL-FC</i> |
| <i>TF</i>  | = 1.1 + 0.14 <i>GlycA</i> + 0.032 <i>Sex</i> - 0.0010 <i>Age</i> + 0.090 <i>S-HDL-FC</i> - 0.037 <i>Ace</i> + 0.039 <i>Ala</i> + 0.024 <i>SFA</i><br>+ 0.013 <i>His</i> - 0.0097 <i>Gln</i>                                                                                                                                                                                                                                                                                                                                                                                                   |

**B)**

|            |                                                                                                                                                                                                                                                                                                                                                                                                                                                                                                                                                                                                 |
|------------|-------------------------------------------------------------------------------------------------------------------------------------------------------------------------------------------------------------------------------------------------------------------------------------------------------------------------------------------------------------------------------------------------------------------------------------------------------------------------------------------------------------------------------------------------------------------------------------------------|
| <i>AAT</i> | = 0 + 0.54 <i>GlycA</i> - 0.17 <i>FAw3</i> - 0.16 <i>VLDL-D</i> + 0.14 <i>HDL3-C</i> + 0.11 <i>LDL-D</i> + 0.11 <i>Phe</i> - 0.096 <i>Leu</i><br>- 0.081 <i>ApoB</i> - 0.058 <i>Alb</i> - 0.057 <i>Tyr</i> + 0.052 <i>boHBut</i> - 0.045 <i>BMI</i> - 0.036 <i>Ala</i> + 0.036 <i>L-HDL-TG</i><br>- 0.035 <i>Ile</i> - 0.033 <i>Ace</i> - 0.027 <i>His</i> + 0.0034 <i>HDL-TG</i>                                                                                                                                                                                                               |
| <i>AGP</i> | = 0 + 0.93 <i>GlycA</i> - 0.27 <i>TotFA</i> + 0.26 <i>IDL-FC</i> + 0.12 <i>L-HDL-FC</i> - 0.11 <i>His</i> - 0.091 <i>HDL-TG</i> + 0.08 <i>BMI</i><br>- 0.079 <i>S-HDL-FC</i> - 0.073 <i>S-LDL-TG</i> - 0.05 <i>boHBut</i> - 0.048 <i>LA</i> + 0.045 <i>S-HDL-CE</i> - 0.043 <i>Lac</i><br>- 0.043 <i>S-VLDL-TG</i> - 0.04 <i>Ace</i> - 0.037 <i>Cit</i> - 0.035 <i>SFA</i> - 0.032 <i>Ala</i> + 0.026 <i>XXL-VLDL-CE</i><br>+ 0.022 <i>Glol</i> + 0.013 <i>Age</i> + 0.013 <i>Crea</i> + 0.0041 <i>Gly</i>                                                                                      |
| <i>HP</i>  | = 0 + 0.84 <i>GlycA</i> - 0.29 <i>LA</i> + 0.21 <i>IDL-FC</i> + 0.18 <i>SM</i> - 0.16 <i>FAw3</i> - 0.14 <i>HDL-TG</i> - 0.088 <i>S-VLDL-CE</i><br>+ 0.087 <i>Age</i> - 0.078 <i>Alb</i> - 0.076 <i>Ile</i> - 0.074 <i>Cit</i> - 0.062 <i>VLDL-D</i> - 0.055 <i>Leu</i> + 0.051 <i>Val</i><br>+ 0.048 <i>L-VLDL-CE</i> + 0.04 <i>Pyr</i> - 0.032 <i>Lac</i> - 0.023 <i>Gln</i> + 0.022 <i>M-HDL-FC</i> - 0.014 <i>XL-HDL-TG</i><br>+ 0.012 <i>XL-HDL-PL</i> - 0.012 <i>His</i> - 0.011 <i>Tyr</i> - 0.0086 <i>BMI</i> - 0.004 <i>L-HDL-TG</i> - 0.0014 <i>PUFA</i><br>+ 0.00025 <i>S-LDL-FC</i> |
| <i>TF</i>  | = 0 + 0.13 <i>GlycA</i> + 0.11 <i>Sex</i> - 0.097 <i>Age</i> + 0.08 <i>S-HDL-FC</i> - 0.057 <i>Ace</i> + 0.037 <i>Ala</i> + 0.031 <i>SFA</i><br>+ 0.011 <i>His</i> - 0.0079 <i>Gln</i>                                                                                                                                                                                                                                                                                                                                                                                                          |

**Table S3: Glycoprotein imputation model accuracy** assessed in the 626 DILGOM07 participants with matched glycoprotein assay, serum NMR-metabolite measures, age, sex, and BMI. The first row shows the Spearman’s rank correlation coefficient ( $\rho$ ) calculated between the predicted and observed glycoprotein measurements in **Figure 1A**. The second row shows its mean  $\pm$  standard deviation in the 10-fold cross-validation procedure used to train each imputation model (**Figure 1B**).

|                               | <b>AAT</b>              | <b>AGP</b>              | <b>HP</b>               | <b>TF</b>              |
|-------------------------------|-------------------------|-------------------------|-------------------------|------------------------|
| <b>Predicted vs. observed</b> | $\rho = 0.66$           | $\rho = 0.78$           | $\rho = 0.74$           | $\rho = 0.45$          |
| <b>Cross-validation</b>       | $\rho = 0.63 \pm 0.077$ | $\rho = 0.74 \pm 0.078$ | $\rho = 0.71 \pm 0.043$ | $\rho = 0.42 \pm 0.10$ |

**Table S4: Listing of outcomes analysed for an association with each glycoprotein.** Provided as a separate excel file. The number next to each glycoprotein indicates the number of outcomes with sufficient events to analyse in the subset of individuals in which each glycoprotein could be imputed. Numbers below the DILGOM07 and FINRISK97 subheadings indicated the number of samples in which each glycoprotein could be imputed.

**Table S5: Significant and replicable glycoprotein associated risks of disease and mortality.**

Details of the cox proportional hazard ratios shown in **Figure S2**. Hazard ratios are listed only where associations were significant and replicable (Storey-Tibshirani FDR adjusted  $P < 0.05/3$  in DILGOM07, FINRISK97, and meta-analysis). Diagnosis data were analysed for a matched 8-year follow-up period of DILGOM07 and FINRISK97. Models were fit using age as the time scale and adjusting for sex, smoking status, BMI, blood pressure, alcohol consumption, prevalent cases, and previously identified biomarkers for 5-year risk of all-cause mortality (citrate, albumin, and VLDL particle size). The alphanumeric codes in the square brackets indicate the ICD10 codes for each outcome. Dataset: “Meta”: inverse-variance weighted fixed effects meta-analysis of DILGOM07 and FINRISK97. “DILGOM07”: hazard ratios calculated using the full DILGOM07 cohort. “FINRISK97”: hazard ratios calculated using the full FINRISK97 cohort. “Training”: hazard ratios calculated from the imputed glycoprotein concentrations in the 615 DILGOM07 participants used to train the imputation models. “Assayed”: hazard ratios calculated from the immunoassayed concentration in the 630 DILGOM07 participants with glycoprotein immunoassay data. #S: sample size of the dataset. #E: number of events that occurred in the 8-year follow-up in the corresponding dataset. #P: number of prevalent cases prior to baseline; adjustment was performed when there were  $\geq 10$  prevalent cases (**Methods**). HR: hazard ratio for the first diagnosis occurrence (fatal or non-fatal) conferred per standard deviation increase of AAT, HP, AGP, or GlycA. 95% CI: 95% confidence interval for the hazard ratio. P: hazard ratio P-value. Q: Storey-Tibshirani FDR adjusted P-value.

|     | Outcome                            | Dataset   | #S     | #E        | #P        | HR   | 95% CI    | P                   | Q                   |
|-----|------------------------------------|-----------|--------|-----------|-----------|------|-----------|---------------------|---------------------|
| AAT | Intestinal infections [A00–A09]    | Meta      | 11,742 | 190       | 215       | 1.38 | 1.21–1.57 | $1 \times 10^{-6}$  | $2 \times 10^{-5}$  |
|     |                                    | FINRISK97 | 7,246  | 112       | 87        | 1.35 | 1.14–1.60 | $4 \times 10^{-4}$  | 0.004               |
|     |                                    | DILGOM07  | 4,496  | 78        | 128       | 1.42 | 1.16–1.74 | $7 \times 10^{-4}$  | 0.006               |
|     |                                    | Training  | 615    | $\leq 20$ | -         | -    | -         | -                   | -                   |
|     |                                    | Assayed   | 630    | $\leq 20$ | -         | -    | -         | -                   | -                   |
| AAT | Gastroenteritis [A09]              | Meta      | 11,742 | 146       | 137       | 1.41 | 1.22–1.63 | $3 \times 10^{-6}$  | $3 \times 10^{-5}$  |
|     |                                    | FINRISK97 | 7,246  | 82        | 51        | 1.36 | 1.12–1.65 | 0.002               | 0.02                |
|     |                                    | DILGOM07  | 4,496  | 64        | 86        | 1.48 | 1.19–1.83 | $3 \times 10^{-4}$  | 0.003               |
|     |                                    | Training  | 615    | $\leq 20$ | -         | -    | -         | -                   | -                   |
|     |                                    | Assayed   | 630    | $\leq 20$ | -         | -    | -         | -                   | -                   |
| AAT | Ischaemic heart diseases [I20–I25] | Meta      | 11,742 | 925       | 502       | 1.21 | 1.13–1.29 | $2 \times 10^{-8}$  | $5 \times 10^{-7}$  |
|     |                                    | FINRISK97 | 7,246  | 568       | 268       | 1.22 | 1.13–1.33 | $2 \times 10^{-6}$  | $1 \times 10^{-4}$  |
|     |                                    | DILGOM07  | 4,496  | 357       | 234       | 1.19 | 1.07–1.33 | 0.002               | 0.01                |
|     |                                    | Training  | 615    | 31        | 26        | 1.68 | 1.19–2.35 | 0.003               | 0.03                |
|     |                                    | Assayed   | 630    | 32        | 27        | 1.44 | 0.94–2.21 | 0.09                | 0.3                 |
| AAT | Heart failure [I50]                | Meta      | 11,742 | 195       | 35        | 1.60 | 1.41–1.82 | $5 \times 10^{-13}$ | $1 \times 10^{-10}$ |
|     |                                    | FINRISK97 | 7,246  | 115       | 12        | 1.51 | 1.26–1.80 | $5 \times 10^{-6}$  | $2 \times 10^{-4}$  |
|     |                                    | DILGOM07  | 4,496  | 80        | 23        | 1.70 | 1.41–2.04 | $2 \times 10^{-8}$  | $4 \times 10^{-6}$  |
|     |                                    | Training  | 615    | $\leq 20$ | -         | -    | -         | -                   | -                   |
|     |                                    | Assayed   | 630    | $\leq 20$ | -         | -    | -         | -                   | -                   |
| AAT | Arterial system diseases [I70–I90] | Meta      | 11,742 | 264       | 104       | 1.39 | 1.24–1.55 | $2 \times 10^{-8}$  | $5 \times 10^{-7}$  |
|     |                                    | FINRISK97 | 7,246  | 152       | 54        | 1.39 | 1.19–1.62 | $4 \times 10^{-5}$  | $5 \times 10^{-4}$  |
|     |                                    | DILGOM07  | 4,496  | 112       | 50        | 1.38 | 1.16–1.63 | $2 \times 10^{-4}$  | 0.003               |
|     |                                    | Training  | 615    | 23        | $\leq 10$ | 1.55 | 1.10–2.19 | 0.01                | 0.07                |
|     |                                    | Assayed   | 630    | 23        | $\leq 10$ | 1.88 | 1.17–3.03 | 0.009               | 0.2                 |
| AAT | Atherosclerosis [I70]              | Meta      | 11,742 | 175       | 64        | 1.52 | 1.33–1.75 | $1 \times 10^{-9}$  | $4 \times 10^{-8}$  |
|     |                                    | FINRISK97 | 7,246  | 113       | 35        | 1.49 | 1.24–1.79 | $2 \times 10^{-5}$  | $3 \times 10^{-4}$  |
|     |                                    | DILGOM07  | 4,496  | 62        | 29        | 1.57 | 1.27–1.93 | $2 \times 10^{-5}$  | $5 \times 10^{-4}$  |
|     |                                    | Training  | 615    | $\leq 20$ | -         | -    | -         | -                   | -                   |
|     |                                    | Assayed   | 630    | $\leq 20$ | -         | -    | -         | -                   | -                   |

|     | Outcome                                      | Dataset   | #S     | #E   | #P   | HR   | 95% CI    | P                   | Q                   |
|-----|----------------------------------------------|-----------|--------|------|------|------|-----------|---------------------|---------------------|
| AAT | Influenza and pneumonia [J10–J18]            | Meta      | 11,742 | 451  | 244  | 1.37 | 1.25–1.50 | $6 \times 10^{-12}$ | $6 \times 10^{-10}$ |
|     |                                              | FINRISK97 | 7,246  | 249  | 91   | 1.39 | 1.23–1.57 | $6 \times 10^{-8}$  | $1 \times 10^{-5}$  |
|     |                                              | DILGOM07  | 4,496  | 202  | 153  | 1.34 | 1.17–1.53 | $2 \times 10^{-5}$  | $5 \times 10^{-4}$  |
|     |                                              | Training  | 615    | 21   | 17   | 1.55 | 1.06–2.27 | 0.03                | 0.09                |
|     |                                              | Assayed   | 630    | 22   | 17   | 1.65 | 1.04–2.61 | 0.03                | 0.2                 |
| AAT | Pneumonia [J18]                              | Meta      | 11,742 | 314  | 156  | 1.35 | 1.22–1.50 | $3 \times 10^{-8}$  | $6 \times 10^{-7}$  |
|     |                                              | FINRISK97 | 7,246  | 145  | 66   | 1.39 | 1.19–1.62 | $3 \times 10^{-5}$  | $5 \times 10^{-4}$  |
|     |                                              | DILGOM07  | 4,496  | 169  | 90   | 1.32 | 1.14–1.53 | $2 \times 10^{-4}$  | 0.003               |
|     |                                              | Training  | 615    | ≤ 20 | -    | -    | -         | -                   | -                   |
|     |                                              | Assayed   | 630    | ≤ 20 | -    | -    | -         | -                   | -                   |
| AAT | Chronic lower respiratory diseases [J40–J47] | Meta      | 11,742 | 603  | 365  | 1.31 | 1.21–1.42 | $3 \times 10^{-11}$ | $2 \times 10^{-9}$  |
|     |                                              | FINRISK97 | 7,246  | 392  | 171  | 1.27 | 1.16–1.40 | $9 \times 10^{-7}$  | $8 \times 10^{-5}$  |
|     |                                              | DILGOM07  | 4,496  | 211  | 194  | 1.41 | 1.22–1.62 | $2 \times 10^{-6}$  | $1 \times 10^{-4}$  |
|     |                                              | Training  | 615    | 25   | 19   | 1.96 | 1.40–2.75 | $1 \times 10^{-4}$  | 0.004               |
|     |                                              | Assayed   | 630    | 25   | 19   | 2.21 | 1.44–3.4  | $3 \times 10^{-4}$  | 0.01                |
| AAT | Chronic obstructive pulmonary disease [J44]  | Meta      | 11,742 | 186  | 51   | 1.54 | 1.34–1.77 | $9 \times 10^{-10}$ | $3 \times 10^{-8}$  |
|     |                                              | FINRISK97 | 7,246  | 129  | 28   | 1.44 | 1.22–1.69 | $2 \times 10^{-5}$  | $3 \times 10^{-4}$  |
|     |                                              | DILGOM07  | 4,496  | 57   | 23   | 1.81 | 1.40–2.33 | $5 \times 10^{-6}$  | $2 \times 10^{-4}$  |
|     |                                              | Training  | 615    | ≤ 20 | -    | -    | -         | -                   | -                   |
|     |                                              | Assayed   | 630    | ≤ 20 | -    | -    | -         | -                   | -                   |
| AAT | Liver diseases [K70–K77]                     | Meta      | 11,742 | 76   | 48   | 1.81 | 1.46–2.25 | $7 \times 10^{-8}$  | $1 \times 10^{-6}$  |
|     |                                              | FINRISK97 | 7,246  | 42   | 15   | 1.69 | 1.27–2.26 | $3 \times 10^{-4}$  | 0.003               |
|     |                                              | DILGOM07  | 4,496  | 34   | 33   | 1.98 | 1.43–2.75 | $4 \times 10^{-5}$  | $8 \times 10^{-4}$  |
|     |                                              | Training  | 615    | ≤ 20 | -    | -    | -         | -                   | -                   |
|     |                                              | Assayed   | 630    | ≤ 20 | -    | -    | -         | -                   | -                   |
| AAT | Inflammatory polyarthropathies [M05–M14]     | Meta      | 11,742 | 327  | 213  | 1.36 | 1.24–1.49 | $6 \times 10^{-11}$ | $3 \times 10^{-9}$  |
|     |                                              | FINRISK97 | 7,246  | 179  | 81   | 1.33 | 1.18–1.50 | $3 \times 10^{-6}$  | $1 \times 10^{-4}$  |
|     |                                              | DILGOM07  | 4,496  | 148  | 132  | 1.40 | 1.21–1.62 | $4 \times 10^{-6}$  | $2 \times 10^{-4}$  |
|     |                                              | Training  | 615    | ≤ 20 | -    | -    | -         | -                   | -                   |
|     |                                              | Assayed   | 630    | ≤ 20 | -    | -    | -         | -                   | -                   |
| HP  | Ischaemic heart diseases [I20–I25]           | Meta      | 11,685 | 914  | 497  | 1.20 | 1.12–1.30 | $1 \times 10^{-6}$  | $3 \times 10^{-5}$  |
|     |                                              | FINRISK97 | 7,194  | 558  | 263  | 1.20 | 1.09–1.33 | $2 \times 10^{-4}$  | 0.005               |
|     |                                              | DILGOM07  | 4,491  | 356  | 234  | 1.21 | 1.08–1.36 | 0.001               | 0.02                |
|     |                                              | Training  | 614    | 31   | 26   | 1.66 | 1.18–2.34 | 0.003               | 0.03                |
|     |                                              | Assayed   | 626    | 30   | 25   | 1.21 | 0.79–1.86 | 0.4                 | 0.2                 |
| HP  | Heart failure [I50]                          | Meta      | 11,685 | 192  | 35   | 1.59 | 1.37–1.85 | $1 \times 10^{-9}$  | $7 \times 10^{-8}$  |
|     |                                              | FINRISK97 | 7,194  | 112  | 12   | 1.61 | 1.31–1.98 | $7 \times 10^{-6}$  | $4 \times 10^{-4}$  |
|     |                                              | DILGOM07  | 4,491  | 80   | 23   | 1.57 | 1.27–1.96 | $5 \times 10^{-5}$  | 0.001               |
|     |                                              | Training  | 614    | ≤ 20 | -    | -    | -         | -                   | -                   |
|     |                                              | Assayed   | 626    | ≤ 20 | -    | -    | -         | -                   | -                   |
| HP  | Arterial system diseases [I70–I90]           | Meta      | 11,685 | 263  | 104  | 1.49 | 1.31–1.69 | $1 \times 10^{-9}$  | $7 \times 10^{-8}$  |
|     |                                              | FINRISK97 | 7,194  | 151  | 54   | 1.61 | 1.34–1.92 | $3 \times 10^{-7}$  | $4 \times 10^{-5}$  |
|     |                                              | DILGOM07  | 4,491  | 112  | 50   | 1.37 | 1.14–1.65 | $7 \times 10^{-4}$  | 0.009               |
|     |                                              | Training  | 614    | 23   | ≤ 10 | 1.52 | 1.05–2.22 | 0.03                | 0.08                |
|     |                                              | Assayed   | 626    | 22   | ≤ 10 | 1.40 | 0.86–2.28 | 0.2                 | 0.1                 |
| HP  | Atherosclerosis [I70]                        | Meta      | 11,685 | 173  | 64   | 1.67 | 1.43–1.94 | $5 \times 10^{-11}$ | $7 \times 10^{-9}$  |
|     |                                              | FINRISK97 | 7,194  | 111  | 35   | 1.69 | 1.37–2.09 | $1 \times 10^{-6}$  | $1 \times 10^{-4}$  |
|     |                                              | DILGOM07  | 4,491  | 62   | 29   | 1.64 | 1.32–2.04 | $1 \times 10^{-5}$  | $4 \times 10^{-4}$  |
|     |                                              | Training  | 614    | ≤ 20 | -    | -    | -         | -                   | -                   |
|     |                                              | Assayed   | 626    | ≤ 20 | -    | -    | -         | -                   | -                   |
| HP  | Influenza and pneumonia [J10–J18]            | Meta      | 11,685 | 447  | 243  | 1.31 | 1.19–1.45 | $1 \times 10^{-7}$  | $5 \times 10^{-6}$  |
|     |                                              | FINRISK97 | 7,194  | 245  | 91   | 1.31 | 1.14–1.51 | $2 \times 10^{-4}$  | 0.005               |
|     |                                              | DILGOM07  | 4,491  | 202  | 152  | 1.32 | 1.14–1.52 | $2 \times 10^{-4}$  | 0.004               |
|     |                                              | Training  | 614    | 21   | 17   | 1.44 | 0.97–2.14 | 0.07                | 0.2                 |
|     |                                              | Assayed   | 626    | 21   | 16   | 1.63 | 0.97–2.75 | 0.07                | 0.07                |

|     | <b>Outcome</b>                               | <b>Dataset</b> | <b>#S</b> | <b>#E</b> | <b>#P</b> | <b>HR</b> | <b>95% CI</b> | <b>P</b>            | <b>Q</b>           |
|-----|----------------------------------------------|----------------|-----------|-----------|-----------|-----------|---------------|---------------------|--------------------|
| HP  | Chronic lower respiratory diseases [J40–J47] | Meta           | 11,685    | 596       | 364       | 1.36      | 1.25–1.49     | $1 \times 10^{-11}$ | $4 \times 10^{-9}$ |
|     |                                              | FINRISK97      | 7,194     | 387       | 170       | 1.30      | 1.16–1.45     | $4 \times 10^{-6}$  | $3 \times 10^{-4}$ |
|     |                                              | DILGOM07       | 4,491     | 209       | 194       | 1.49      | 1.28–1.74     | $2 \times 10^{-7}$  | $5 \times 10^{-5}$ |
|     |                                              | Training       | 614       | 23        | 19        | 1.99      | 1.35–2.94     | $5 \times 10^{-4}$  | 0.02               |
|     |                                              | Assayed        | 626       | 23        | 19        | 2.69      | 1.53–4.72     | $6 \times 10^{-4}$  | 0.009              |
| HP  | Chronic obstructive pulmonary disease [J44]  | Meta           | 11,685    | 182       | 50        | 1.53      | 1.30–1.81     | $3 \times 10^{-7}$  | $1 \times 10^{-5}$ |
|     |                                              | FINRISK97      | 7,194     | 126       | 27        | 1.45      | 1.19–1.78     | $3 \times 10^{-4}$  | 0.006              |
|     |                                              | DILGOM07       | 4,491     | 56        | 23        | 1.72      | 1.29–2.29     | $2 \times 10^{-4}$  | 0.004              |
|     |                                              | Training       | 614       | ≤ 20      | -         | -         | -             | -                   | -                  |
|     |                                              | Assayed        | 626       | ≤ 20      | -         | -         | -             | -                   | -                  |
| HP  | Inflammatory polyarthropathies [M05–M14]     | Meta           | 11,685    | 323       | 208       | 1.42      | 1.27–1.59     | $9 \times 10^{-10}$ | $7 \times 10^{-8}$ |
|     |                                              | FINRISK97      | 7,194     | 176       | 76        | 1.49      | 1.28–1.74     | $2 \times 10^{-7}$  | $4 \times 10^{-5}$ |
|     |                                              | DILGOM07       | 4,491     | 147       | 132       | 1.34      | 1.13–1.58     | $6 \times 10^{-4}$  | 0.009              |
|     |                                              | Training       | 614       | ≤ 20      | -         | -         | -             | -                   | -                  |
|     |                                              | Assayed        | 626       | ≤ 20      | -         | -         | -             | -                   | -                  |
| AGP | Heart failure [I50]                          | Meta           | 11,625    | 191       | 35        | 1.56      | 1.35–1.81     | $4 \times 10^{-9}$  | $1 \times 10^{-6}$ |
|     |                                              | FINRISK97      | 7,151     | 112       | 12        | 1.60      | 1.31–1.95     | $4 \times 10^{-6}$  | $5 \times 10^{-4}$ |
|     |                                              | DILGOM07       | 4,474     | 79        | 23        | 1.52      | 1.22–1.89     | $2 \times 10^{-4}$  | 0.009              |
|     |                                              | Training       | 615       | ≤ 20      | -         | -         | -             | -                   | -                  |
|     |                                              | Assayed        | 630       | ≤ 20      | -         | -         | -             | -                   | -                  |
| AGP | Chronic lower respiratory diseases [J40–J47] | Meta           | 11,625    | 596       | 364       | 1.31      | 1.19–1.43     | $1 \times 10^{-8}$  | $2 \times 10^{-6}$ |
|     |                                              | FINRISK97      | 7,151     | 385       | 170       | 1.25      | 1.12–1.40     | $7 \times 10^{-5}$  | 0.004              |
|     |                                              | DILGOM07       | 4,474     | 211       | 194       | 1.43      | 1.22–1.68     | $1 \times 10^{-5}$  | 0.003              |
|     |                                              | Training       | 615       | 25        | 19        | 2.10      | 1.47–3.01     | $5 \times 10^{-5}$  | $4 \times 10^{-4}$ |
|     |                                              | Assayed        | 630       | 25        | 19        | 1.63      | 1.12–2.39     | 0.01                | 0.07               |

**Table S6: Spearman correlation between GlycA and each glycoprotein.** Immunoassayed: Spearman correlation between GlycA and each immunoassayed glycoprotein in the 626 DILGOM07 participants with matched immunoassay and NMR-metabolite measures. Training: Spearman correlation between GlycA and the imputed glycoprotein levels in the 615 DILGOM07 participants used for model training. DILGOM07: Spearman correlation between GlycA and the imputed glycoprotein levels in all 4,540 DILGOM07 participants. FINRISK97: Spearman correlation between GlycA and the imputed glycoprotein levels in all 7,321 FINRISK97 participants.

| <b>Glycoprotein</b> | <b>Immunoassayed</b> | <b>Training</b> | <b>DILGOM07</b> | <b>FINRISK97</b> |
|---------------------|----------------------|-----------------|-----------------|------------------|
| AAT                 | 0.31                 | 0.54            | 0.44            | 0.71             |
| HP                  | 0.59                 | 0.84            | 0.82            | 0.82             |
| AGP                 | 0.65                 | 0.85            | 0.83            | 0.83             |
| TF                  | 0.28                 | -               | -               | -                |



**Table S7: Comparison of biomarkers in meta-analysis of DILGOM07 and FINRISK97** for all outcomes for which at least one of AAT, HP, or AGP was a significant and replicable biomarker in **Figure 2**. Details of Cox proportional hazard ratios shown in **Figure S4**. The alphanumeric codes in the square brackets indicate the ICD10 codes or disease categories for each outcome. A “\*” next to AAT, HP, or AGP indicates that its association was significant and replicable (Storey Tibshirani FDR adjusted  $P < 0.05/3$  in DILGOM07, FINRISK97, and meta-analysis). #S: total number of samples in the meta-analysis. #E: total number of events that occurred in the meta-analysis. #P: number of prevalent cases prior to baseline in all samples in the meta-analysis. HR: hazard ratio for combined incidence and mortality conferred per standard deviation increase of AAT, HP, AGP, or GlycA. 95% CI: 95% confidence interval for the hazard ratio. P: hazard ratio P-value. Q: Storey-Tibshirani FDR adjusted P-value (**Methods**).

| Outcome                                      | Biomarker | #S     | #E  | #P  | HR   | 95% CI    | P                   | Q                   |
|----------------------------------------------|-----------|--------|-----|-----|------|-----------|---------------------|---------------------|
| Intestinal infections [A00-A09]              | *AAT      | 11,742 | 190 | 215 | 1.38 | 1.21–1.57 | $1 \times 10^{-6}$  | $2 \times 10^{-5}$  |
|                                              | HP        | 11,685 | 189 | 214 | 1.35 | 1.16–1.57 | $1 \times 10^{-4}$  | 0.001               |
|                                              | AGP       | 11,625 | 189 | 213 | 1.24 | 1.06–1.45 | 0.007               | 0.04                |
|                                              | GlycA     | 11,861 | 192 | 217 | 1.49 | 1.24–1.78 | $2 \times 10^{-5}$  | $2 \times 10^{-4}$  |
| Gastroenteritis [A09]                        | *AAT      | 11,742 | 146 | 137 | 1.41 | 1.22–1.63 | $3 \times 10^{-6}$  | $3 \times 10^{-5}$  |
|                                              | HP        | 11,685 | 145 | 136 | 1.43 | 1.20–1.70 | $5 \times 10^{-5}$  | $7 \times 10^{-4}$  |
|                                              | AGP       | 11,625 | 145 | 137 | 1.29 | 1.08–1.54 | 0.004               | 0.03                |
|                                              | GlycA     | 11,861 | 148 | 138 | 1.51 | 1.24–1.85 | $6 \times 10^{-5}$  | $7 \times 10^{-4}$  |
| Ischaemic heart diseases [I20-I25]           | *AAT      | 11,742 | 925 | 502 | 1.21 | 1.13–1.29 | $2 \times 10^{-8}$  | $5 \times 10^{-7}$  |
|                                              | *HP       | 11,685 | 914 | 497 | 1.20 | 1.12–1.30 | $1 \times 10^{-6}$  | $3 \times 10^{-5}$  |
|                                              | AGP       | 11,625 | 916 | 496 | 1.18 | 1.10–1.27 | $1 \times 10^{-5}$  | $5 \times 10^{-4}$  |
|                                              | GlycA     | 11,861 | 938 | 509 | 1.31 | 1.19–1.43 | $7 \times 10^{-9}$  | $7 \times 10^{-7}$  |
| Heart failure [I50]                          | *AAT      | 11,742 | 195 | 35  | 1.60 | 1.41–1.82 | $5 \times 10^{-13}$ | $1 \times 10^{-10}$ |
|                                              | *HP       | 11,685 | 192 | 35  | 1.59 | 1.37–1.85 | $1 \times 10^{-9}$  | $7 \times 10^{-8}$  |
|                                              | *AGP      | 11,625 | 191 | 35  | 1.56 | 1.35–1.81 | $4 \times 10^{-9}$  | $1 \times 10^{-6}$  |
|                                              | GlycA     | 11,861 | 195 | 35  | 1.66 | 1.38–2.00 | $9 \times 10^{-8}$  | $3 \times 10^{-6}$  |
| Arterial system diseases [I70-I79]           | *AAT      | 11,742 | 264 | 104 | 1.39 | 1.24–1.55 | $2 \times 10^{-8}$  | $5 \times 10^{-7}$  |
|                                              | *HP       | 11,685 | 263 | 104 | 1.49 | 1.31–1.69 | $1 \times 10^{-9}$  | $7 \times 10^{-8}$  |
|                                              | AGP       | 11,625 | 260 | 105 | 1.45 | 1.27–1.65 | $2 \times 10^{-8}$  | $2 \times 10^{-6}$  |
|                                              | GlycA     | 11,861 | 267 | 106 | 1.55 | 1.32–1.83 | $1 \times 10^{-7}$  | $3 \times 10^{-6}$  |
| Atherosclerosis [I70]                        | *AAT      | 11,742 | 175 | 64  | 1.52 | 1.33–1.75 | $1 \times 10^{-9}$  | $4 \times 10^{-8}$  |
|                                              | *HP       | 11,685 | 173 | 64  | 1.67 | 1.43–1.94 | $5 \times 10^{-11}$ | $7 \times 10^{-9}$  |
|                                              | AGP       | 11,625 | 171 | 64  | 1.54 | 1.32–1.80 | $7 \times 10^{-8}$  | $4 \times 10^{-6}$  |
|                                              | GlycA     | 11,861 | 176 | 65  | 1.86 | 1.55–2.25 | $6 \times 10^{-11}$ | $9 \times 10^{-9}$  |
| Influenza and pneumonia [J10-J18]            | *AAT      | 11,742 | 451 | 244 | 1.37 | 1.25–1.50 | $6 \times 10^{-12}$ | $6 \times 10^{-10}$ |
|                                              | *HP       | 11,685 | 447 | 243 | 1.31 | 1.19–1.45 | $1 \times 10^{-7}$  | $5 \times 10^{-6}$  |
|                                              | AGP       | 11,625 | 446 | 242 | 1.23 | 1.10–1.36 | $1 \times 10^{-4}$  | 0.004               |
|                                              | GlycA     | 11,861 | 457 | 247 | 1.37 | 1.20–1.56 | $2 \times 10^{-6}$  | $4 \times 10^{-5}$  |
| Pneumonia [J18]                              | *AAT      | 11,742 | 314 | 156 | 1.35 | 1.22–1.51 | $3 \times 10^{-8}$  | $6 \times 10^{-7}$  |
|                                              | HP        | 11,685 | 311 | 155 | 1.25 | 1.11–1.41 | $3 \times 10^{-4}$  | 0.003               |
|                                              | AGP       | 11,625 | 310 | 155 | 1.16 | 1.03–1.32 | 0.02                | 0.08                |
|                                              | GlycA     | 11,861 | 319 | 159 | 1.26 | 1.08–1.47 | 0.004               | 0.02                |
| Chronic lower respiratory diseases [J40-J47] | *AAT      | 11,742 | 603 | 365 | 1.31 | 1.21–1.42 | $3 \times 10^{-11}$ | $2 \times 10^{-9}$  |
|                                              | *HP       | 11,685 | 596 | 364 | 1.36 | 1.25–1.49 | $1 \times 10^{-11}$ | $4 \times 10^{-9}$  |
|                                              | *AGP      | 11,625 | 596 | 364 | 1.31 | 1.19–1.43 | $1 \times 10^{-8}$  | $2 \times 10^{-6}$  |
|                                              | GlycA     | 11,861 | 607 | 368 | 1.36 | 1.22–1.52 | $2 \times 10^{-8}$  | $1 \times 10^{-6}$  |
| Chronic obstructive pulmonary diseases [J44] | *AAT      | 11,742 | 186 | 51  | 1.54 | 1.34–1.77 | $9 \times 10^{-10}$ | $3 \times 10^{-8}$  |
|                                              | *HP       | 11,685 | 182 | 50  | 1.53 | 1.30–1.81 | $3 \times 10^{-7}$  | $1 \times 10^{-5}$  |
|                                              | AGP       | 11,625 | 184 | 51  | 1.33 | 1.13–1.56 | $7 \times 10^{-4}$  | 0.01                |
|                                              | GlycA     | 11,861 | 188 | 55  | 1.57 | 1.29–1.90 | $4 \times 10^{-6}$  | $8 \times 10^{-5}$  |

| <b>Outcome</b>                           | <b>Biomarker</b> | <b>#S</b> | <b>#E</b> | <b>#P</b> | <b>HR</b> | <b>95% CI</b> | <b>P</b>            | <b>Q</b>           |
|------------------------------------------|------------------|-----------|-----------|-----------|-----------|---------------|---------------------|--------------------|
| Liver diseases [K70-K77]                 | *AAT             | 11,742    | 76        | 48        | 1.81      | 1.46–2.25     | $7 \times 10^{-8}$  | $1 \times 10^{-6}$ |
|                                          | HP               | 11,685    | 70        | 46        | 1.30      | 0.98–1.71     | 0.07                | 0.2                |
|                                          | AGP              | 11,625    | 74        | 47        | 1.05      | 0.79–1.40     | 0.7                 | 0.8                |
|                                          | GlycA            | 11,861    | 83        | 50        | 1.75      | 1.30–2.35     | $2 \times 10^{-4}$  | 0.002              |
| Inflammatory polyarthropathies [M05-M14] | *AAT             | 11,742    | 327       | 213       | 1.36      | 1.24–1.49     | $6 \times 10^{-11}$ | $3 \times 10^{-9}$ |
|                                          | *HP              | 11,685    | 323       | 208       | 1.42      | 1.27–1.59     | $9 \times 10^{-10}$ | $7 \times 10^{-8}$ |
|                                          | AGP              | 11,625    | 322       | 210       | 1.38      | 1.23–1.54     | $3 \times 10^{-8}$  | $2 \times 10^{-6}$ |
|                                          | GlycA            | 11,861    | 332       | 215       | 1.46      | 1.28–1.68     | $4 \times 10^{-8}$  | $1 \times 10^{-6}$ |

**Table S8: Association between AAT and replicable gene coexpression network modules in DILGOM07.** The tested gene coexpression network modules are those that were previously identified in DILGOM07 and found to topologically replicate in an independent cohort study (**Methods**). Linear regression models were fit between log-transformed AAT and each modules summary expression profile (first principal component) adjusting for participant age and sex. Modules were given numeric labels in descending order of module size (40 modules were identified, 20 were found to be topologically replicable). Module names are given based on GO term enrichment performed in previous studies, with the exception of module 5 whose enrichment (**Methods**) is first reported in this study (**Table S9**). Effect size indicates the change in standard deviations of immunoassayed AAT conferred per standard deviation increase of each module's coordinated expression adjusting for participant age and sex. CI 95% indicates the 95% confidence interval for the effect size. An association was considered significant (top three modules) where its P-value < 0.0025 (0.05/20, Bonferroni correcting for the total number of modules tested).

| Module | Name                       | Genes | Effect size | CI 95%           | P-value            |
|--------|----------------------------|-------|-------------|------------------|--------------------|
| 6      | General immune module A    | 1,019 | 0.17        | [0.084, 0.25]    | $1 \times 10^{-4}$ |
| 10     | General immune module B    | 339   | 0.15        | [0.066, 0.24]    | $7 \times 10^{-4}$ |
| 5      | RNA processing module      | 1,734 | -0.14       | [-0.23, -0.056]  | 0.001              |
| 22     | B cell activity module     | 67    | -0.13       | [-0.22, -0.046]  | 0.003              |
| 29     | Neutrophil module          | 31    | 0.11        | [0.019, 0.20]    | 0.02               |
| 14     | -                          | 225   | 0.10        | [0.013, 0.19]    | 0.02               |
| 16     | Cytotoxic cell-like module | 179   | -0.098      | [-0.19, -0.0073] | 0.03               |
| 18     | Viral response module      | 112   | 0.089       | [0.0026, 0.17]   | 0.04               |
| 7      | -                          | 604   | -0.083      | [-0.17, 0.0059]  | 0.07               |
| 26     | -                          | 40    | -0.071      | [-0.16, 0.015]   | 0.1                |
| 12     | -                          | 255   | -0.065      | [-0.15, 0.024]   | 0.2                |
| 27     | -                          | 39    | 0.064       | [-0.024, 0.15]   | 0.2                |
| 9      | -                          | 545   | -0.049      | [-0.14, 0.037]   | 0.3                |
| 33     | -                          | 28    | 0.045       | [-0.042, 0.13]   | 0.3                |
| 38     | Lipid leukocyte module     | 15    | 0.031       | [-0.055, 0.12]   | 0.5                |
| 23     | -                          | 64    | -0.024      | [-0.11, 0.062]   | 0.6                |
| 2      | -                          | 5,403 | 0.011       | [-0.078, 0.099]  | 0.8                |
| 4      | -                          | 1,775 | -0.0080     | [-0.096, 0.080]  | 0.9                |
| 17     | Platelet module            | 138   | -0.0050     | [-0.092, 0.082]  | 0.9                |
| 13     | -                          | 239   | -0.0038     | [-0.091, 0.083]  | 0.9                |

**Table S9: Enrichment analysis for the RNA processing gene coexpression network module. A)** Gene Ontology (GO) biological process terms significantly over-represented in the core gene set for the RNA processing module (**Methods**). #AG: number of genes on the Illumina HT-12 array annotated with the corresponding GO term (17,519 genes on the array with any GO annotation). #MG: number of core module genes annotated for the corresponding GO terms (183 core module genes). P-value: P-value from a hypergeometric test. FDR: Benjamini-Hochberg FDR adjusted P-value. GO terms are displayed where FDR < 0.05. **B)** REVIGO ranking of significant GO terms by information content. Frequency: “percentage” of array annotated for the corresponding GO term. Uniqueness: REVIGO measure of semantic uniqueness when compared to all other GO terms. Dispensability: REVIGO measure of semantic redundancy when compared to its most similar GO term.

**A)**

| GO ID      | GO Term                                          | #AG   | #MG | P-value            | FDR                |
|------------|--------------------------------------------------|-------|-----|--------------------|--------------------|
| GO:0006396 | RNA processing                                   | 721   | 27  | $8 \times 10^{-9}$ | $1 \times 10^{-4}$ |
| GO:0010467 | gene expression                                  | 941   | 30  | $4 \times 10^{-8}$ | $3 \times 10^{-4}$ |
| GO:0034641 | cellular nitrogen compound metabolic process     | 4,948 | 85  | $1 \times 10^{-7}$ | $5 \times 10^{-4}$ |
| GO:0006807 | nitrogen compound metabolic process              | 5,282 | 86  | $1 \times 10^{-6}$ | $4 \times 10^{-3}$ |
| GO:0046483 | heterocycle metabolic process                    | 4,371 | 74  | $3 \times 10^{-6}$ | $8 \times 10^{-3}$ |
| GO:0006139 | nucleobase-containing compound metabolic process | 4,184 | 71  | $5 \times 10^{-6}$ | 0.01               |
| GO:0034470 | ncRNA processing                                 | 313   | 14  | $5 \times 10^{-6}$ | 0.01               |
| GO:0006725 | cellular aromatic compound metabolic process     | 4,386 | 73  | $6 \times 10^{-6}$ | 0.01               |
| GO:0007005 | mitochondrion organization                       | 496   | 17  | $2 \times 10^{-5}$ | 0.03               |
| GO:0016071 | mRNA metabolic process                           | 545   | 18  | $2 \times 10^{-5}$ | 0.03               |
| GO:1901360 | organic cyclic compound metabolic process        | 4,616 | 74  | $2 \times 10^{-5}$ | 0.03               |
| GO:0071826 | ribonucleoprotein complex subunit organization   | 192   | 10  | $3 \times 10^{-5}$ | 0.04               |

**B)**

| GO ID      | GO Term                                          | Frequency | Uniqueness | Dispensability |
|------------|--------------------------------------------------|-----------|------------|----------------|
| GO:0006396 | RNA processing                                   | 1.63%     | 0.467      | 0              |
| GO:0007005 | mitochondrion organization                       | 0.65%     | 0.711      | 0.046          |
| GO:0006807 | nitrogen compound metabolic process              | 26.57%    | 0.642      | 0.100          |
| GO:0010467 | gene expression                                  | 15.38%    | 0.542      | 0.283          |
| GO:1901360 | organic cyclic compound metabolic process        | 25.43%    | 0.572      | 0.299          |
| GO:0071826 | ribonucleoprotein complex subunit organization   | 0.33%     | 0.772      | 0.341          |
| GO:0034641 | cellular nitrogen compound metabolic process     | 25.26%    | 0.430      | 0.354          |
| GO:0006139 | nucleobase-containing compound metabolic process | 24.26%    | 0.391      | 0.697          |
| GO:0046483 | heterocycle metabolic process                    | 24.80%    | 0.534      | 0.361          |
| GO:0006725 | cellular aromatic compound metabolic process     | 24.91%    | 0.534      | 0.362          |
| GO:0034470 | ncRNA processing                                 | 0.55%     | 0.506      | 0.384          |
| GO:0016071 | mRNA metabolic process                           | 1.10%     | 0.482      | 0.415          |

**Table S10: Curated gene sets significantly enriched for genes associated with AAT.** Hallmark pathways, KEGG pathways, Reactome pathways, GO biological process (GO:BP) terms, GO molecular function (GO:MF) terms, and GO cellular compartment (GO:CC) terms significantly enriched for AAT-associated differential expression (**Methods**). Size: number of genes on the Illumina HT-12 array annotated for the corresponding gene set. NES: enrichment score normalised by the average enrichment score for the respective gene set in a permutation procedure with 1,000 permutations (**Methods**). A positive NES indicates the gene set is enriched for genes upregulated with elevated AAT while a negative NES indicates the gene set is enriched for genes downregulated with elevated AAT. FDR: Benjamini-Hochberg FDR adjusted permutation test P-value for enrichment. FDR correction was performed within each collection separately. Gene sets with FDR<0.05 are shown.

| Collection | Gene set                                                         | Size | NES  | FDR   |
|------------|------------------------------------------------------------------|------|------|-------|
| Hallmark   | Reactive oxygen species pathway                                  | 43   | 2.21 | 0.002 |
| Hallmark   | Inflammatory response                                            | 193  | 2.09 | 0.004 |
| Hallmark   | TNF $\alpha$ signaling via NF $\kappa$ B                         | 194  | 1.92 | 0.01  |
| Hallmark   | PI3K/AKT/mTOR signaling                                          | 101  | 1.88 | 0.02  |
| Hallmark   | IL6/JAK/STAT3 signaling                                          | 81   | 1.94 | 0.02  |
| Hallmark   | Apoptosis                                                        | 154  | 1.85 | 0.02  |
| Hallmark   | Complement                                                       | 188  | 1.80 | 0.02  |
| Hallmark   | Hypoxia                                                          | 186  | 1.83 | 0.02  |
| Hallmark   | Interferon gamma response                                        | 195  | 1.81 | 0.02  |
| Hallmark   | Interferon alpha response                                        | 92   | 1.74 | 0.03  |
| KEGG       | Leishmania infection                                             | 65   | 1.95 | 0.04  |
| KEGG       | Toll-like receptor signaling pathway                             | 96   | 2.05 | 0.04  |
| KEGG       | Type II diabetes mellitus                                        | 43   | 1.98 | 0.04  |
| KEGG       | Fc gamma R-mediated phagocytosis                                 | 92   | 1.89 | 0.05  |
| KEGG       | NOD-like receptor signaling pathway                              | 57   | 1.82 | 0.05  |
| KEGG       | Systemic lupus erythematosus                                     | 123  | 1.84 | 0.05  |
| KEGG       | Insulin signaling pathway                                        | 127  | 1.78 | 0.05  |
| KEGG       | Amino sugar and nucleotide sugar metabolism                      | 42   | 1.76 | 0.05  |
| KEGG       | ErbB signaling pathway                                           | 81   | 1.85 | 0.05  |
| KEGG       | Progesterone mediated oocyte maturation                          | 77   | 1.77 | 0.05  |
| KEGG       | GnRH signaling pathway                                           | 94   | 1.79 | 0.05  |
| KEGG       | Nicotinate and nicotinamide metabolism                           | 22   | 1.80 | 0.05  |
| Reactome   | Activated TLR4 signalling                                        | 82   | 1.95 | 0.04  |
| Reactome   | Meiotic synapsis                                                 | 66   | 1.93 | 0.04  |
| Reactome   | MYD88:Mal cascade initiated on plasma membrane                   | 72   | 1.98 | 0.04  |
| Reactome   | MAPK targets nuclear events mediated by MAP kinases              | 28   | 1.96 | 0.04  |
| Reactome   | GABA(B) receptor activation                                      | 38   | 1.94 | 0.04  |
| Reactome   | Toll receptor cascades                                           | 102  | 1.98 | 0.04  |
| Reactome   | Packaging of telomere ends                                       | 46   | 1.90 | 0.05  |
| Reactome   | Latent infection of homo sapiens with mycobacterium tuberculosis | 28   | 1.90 | 0.05  |
| Reactome   | Amyloids                                                         | 73   | 1.99 | 0.05  |
| GO:BP      | Cell redox homeostasis                                           | 59   | 2.22 | 0.005 |
| GO:BP      | Cytokine production involved in immune response                  | 17   | 2.24 | 0.006 |
| GO:BP      | Membrane invagination                                            | 27   | 2.22 | 0.006 |
| GO:BP      | Regulation of interleukin 8 production                           | 55   | 2.14 | 0.008 |
| GO:BP      | Cellular response to mechanical stimulus                         | 73   | 2.17 | 0.008 |
| GO:BP      | Positive regulation of interleukin 1 secretion                   | 24   | 2.15 | 0.009 |
| GO:BP      | Defense response to bacterium                                    | 188  | 2.15 | 0.01  |
| GO:BP      | Regulation of interleukin 1 secretion                            | 32   | 2.25 | 0.01  |
| GO:BP      | CAMP biosynthetic process                                        | 16   | 2.10 | 0.02  |
| GO:BP      | Response to bacterium                                            | 464  | 2.05 | 0.02  |
| GO:BP      | Acute phase response                                             | 38   | 2.05 | 0.02  |
| GO:BP      | Positive regulation of interleukin 1 production                  | 36   | 2.05 | 0.02  |
| GO:BP      | Defense response to gram positive bacterium                      | 65   | 2.07 | 0.02  |

| Collection | Gene set                                                                              | Size | NES  | FDR  |
|------------|---------------------------------------------------------------------------------------|------|------|------|
| GO:BP      | Defense response to gram negative bacterium                                           | 39   | 2.06 | 0.02 |
| GO:BP      | Cytokine production                                                                   | 111  | 2.06 | 0.02 |
| GO:BP      | Positive regulation of interleukin 8 production                                       | 42   | 2.02 | 0.02 |
| GO:BP      | Fc gamma receptor signaling pathway                                                   | 72   | 2.02 | 0.02 |
| GO:BP      | Organ or tissue specific immune response                                              | 27   | 2.03 | 0.02 |
| GO:BP      | Regulation of myoblast fusion                                                         | 18   | 2.01 | 0.02 |
| GO:BP      | Positive regulation of interleukin 1 beta production                                  | 30   | 2.03 | 0.02 |
| GO:BP      | Defense response to other organism                                                    | 432  | 1.99 | 0.03 |
| GO:BP      | Response to muscle stretch                                                            | 18   | 2.00 | 0.03 |
| GO:BP      | Cytokine secretion                                                                    | 35   | 1.99 | 0.03 |
| GO:BP      | Phagocytosis                                                                          | 156  | 1.98 | 0.03 |
| GO:BP      | Dendritic cell differentiation                                                        | 32   | 1.98 | 0.03 |
| GO:BP      | Regulation of tumor necrosis factor superfamily cytokine production                   | 95   | 1.98 | 0.03 |
| GO:BP      | NADP metabolic process                                                                | 24   | 1.98 | 0.03 |
| GO:BP      | Detection of biotic stimulus                                                          | 26   | 1.96 | 0.03 |
| GO:BP      | Regulation of cytokine secretion                                                      | 139  | 1.96 | 0.03 |
| GO:BP      | T cell differentiation involved in immune response                                    | 28   | 1.96 | 0.03 |
| GO:BP      | Regulation of NF-kappaB import into nucleus                                           | 43   | 1.96 | 0.03 |
| GO:BP      | Antimicrobial humoral response                                                        | 43   | 1.97 | 0.03 |
| GO:BP      | Cellular response to external stimulus                                                | 244  | 1.95 | 0.03 |
| GO:BP      | Interleukin 1 production                                                              | 15   | 1.95 | 0.03 |
| GO:BP      | Regulation of Toll-like receptor signaling pathway                                    | 44   | 1.95 | 0.04 |
| GO:BP      | positive regulation of Toll-like receptor signaling pathway                           | 19   | 1.92 | 0.04 |
| GO:BP      | Regulation of syncytium formation by plasma membrane fusion                           | 23   | 1.92 | 0.04 |
| GO:BP      | Cellular response to starvation                                                       | 107  | 1.92 | 0.04 |
| GO:BP      | Defense response to fungus                                                            | 35   | 1.93 | 0.04 |
| GO:BP      | Positive regulation of mitotic nuclear division                                       | 46   | 1.93 | 0.04 |
| GO:BP      | Ammonium transport                                                                    | 57   | 1.93 | 0.04 |
| GO:BP      | Regulation of tumor necrosis factor biosynthetic process                              | 18   | 1.92 | 0.04 |
| GO:BP      | Positive regulation of reactive oxygen species metabolic process                      | 75   | 1.93 | 0.04 |
| GO:BP      | MyD88 dependent Toll-like receptor signaling pathway                                  | 25   | 1.93 | 0.04 |
| GO:BP      | Negative regulation of biomineral tissue development                                  | 17   | 1.93 | 0.04 |
| GO:BP      | Response to molecule of bacterial origin                                              | 304  | 1.93 | 0.04 |
| GO:BP      | Regulation of translation in response to stress                                       | 17   | 1.89 | 0.04 |
| GO:BP      | Positive regulation of nuclear division                                               | 57   | 1.89 | 0.04 |
| GO:BP      | Myeloid leukocyte activation                                                          | 92   | 1.90 | 0.04 |
| GO:BP      | Acute inflammatory response                                                           | 68   | 1.89 | 0.04 |
| GO:BP      | Protein secretion                                                                     | 103  | 1.90 | 0.04 |
| GO:BP      | Detection of other organism                                                           | 18   | 1.89 | 0.04 |
| GO:BP      | Ectoderm development                                                                  | 19   | 1.89 | 0.04 |
| GO:BP      | Regulation of T helper cell differentiation                                           | 25   | 1.90 | 0.04 |
| GO:BP      | Response to starvation                                                                | 141  | 1.89 | 0.04 |
| GO:BP      | Positive regulation of neuron apoptotic process                                       | 44   | 1.90 | 0.04 |
| GO:BP      | Regulation of interleukin 1 production                                                | 57   | 1.89 | 0.04 |
| GO:BP      | Inflammatory response                                                                 | 426  | 1.90 | 0.04 |
| GO:BP      | DNA replication dependent nucleosome organization                                     | 30   | 1.88 | 0.04 |
| GO:BP      | Negative regulation of blood circulation                                              | 31   | 1.90 | 0.04 |
| GO:BP      | Response to fungus                                                                    | 48   | 1.88 | 0.04 |
| GO:BP      | Antigen processing and presentation of exogenous peptide antigen via MHC class I      | 63   | 1.87 | 0.05 |
| GO:BP      | Cellular response to growth hormone stimulus                                          | 20   | 1.88 | 0.05 |
| GO:BP      | Regulation of viral entry into host cell                                              | 27   | 1.87 | 0.05 |
| GO:BP      | Negative regulation of oxidative stress induced intrinsic apoptotic signaling pathway | 19   | 1.86 | 0.05 |
| GO:BP      | Trachea development                                                                   | 19   | 1.87 | 0.05 |
| GO:BP      | Regulation of innate immune response                                                  | 325  | 1.86 | 0.05 |
| GO:BP      | Response to mechanical stimulus                                                       | 196  | 1.87 | 0.05 |
| GO:BP      | Regulation of interleukin 1 beta production                                           | 47   | 1.86 | 0.05 |
| GO:BP      | Phagocytosis engulfment                                                               | 17   | 1.87 | 0.05 |
| GO:BP      | Antigen processing and presentation of peptide antigen via MHC class I                | 86   | 1.86 | 0.05 |
| GO:BP      | Peptidyl cysteine modification                                                        | 18   | 1.86 | 0.05 |

| Collection | Gene set                                                           | Size | NES   | FDR   |
|------------|--------------------------------------------------------------------|------|-------|-------|
| GO:BP      | Regulation of the force of heart contraction                       | 27   | 1.85  | 0.05  |
| GO:BP      | Innate immune response in mucosa                                   | 18   | 1.85  | 0.05  |
| GO:BP      | Immune effector process                                            | 426  | 1.86  | 0.05  |
| GO:BP      | Regulation of interleukin 6 production                             | 95   | 1.85  | 0.05  |
| GO:BP      | Embryonic placenta development                                     | 76   | 1.85  | 0.05  |
| GO:BP      | T-cell activation involved in immune response                      | 58   | 1.86  | 0.05  |
| GO:BP      | STAT cascade                                                       | 50   | 1.85  | 0.05  |
| GO:BP      | Negative regulation of viral process                               | 84   | 1.85  | 0.05  |
| GO:BP      | Negative regulation of immune response                             | 113  | 1.85  | 0.05  |
| GO:BP      | Receptor catabolic process                                         | 15   | 1.83  | 0.05  |
| GO:BP      | Regulation of type 2 immune response                               | 25   | 1.82  | 0.05  |
| GO:BP      | Positive regulation of response to extracellular stimulus          | 46   | 1.83  | 0.05  |
| GO:BP      | Activation of immune response                                      | 366  | 1.82  | 0.05  |
| GO:BP      | Myeloid dendritic cell differentiation                             | 20   | 1.83  | 0.05  |
| GO:MF      | Solute cation antiporter activity                                  | 26   | 2.11  | 0.008 |
| GO:MF      | Ion antiporter activity                                            | 42   | 2.14  | 0.009 |
| GO:MF      | Cation-cation antiporter activity                                  | 20   | 2.19  | 0.009 |
| GO:MF      | Cysteine type endopeptidase activity involved in apoptotic process | 15   | 2.03  | 0.02  |
| GO:MF      | Lysophospholipid acyltransferase activity                          | 18   | 2.00  | 0.03  |
| GO:MF      | Signaling pattern recognition receptor activity                    | 17   | 1.98  | 0.03  |
| GO:MF      | Acylglycerol O-acyltransferase activity                            | 25   | 1.94  | 0.03  |
| GO:MF      | Immunoglobulin binding                                             | 22   | 1.95  | 0.04  |
| GO:MF      | G protein beta gamma subunit complex binding                       | 19   | 1.93  | 0.04  |
| GO:MF      | O-acyltransferase activity                                         | 43   | 1.91  | 0.04  |
| GO:CC      | Phagocytic vesicle                                                 | 74   | 2.11  | 0.008 |
| GO:CC      | Phagocytic vesicle membrane                                        | 48   | 1.95  | 0.03  |
| GO:CC      | Primary lysosome                                                   | 16   | 1.95  | 0.04  |
| KEGG       | Homologous recombination                                           | 24   | -1.88 | 0.03  |
| KEGG       | Base excision repair                                               | 31   | -1.84 | 0.04  |
| KEGG       | Lysine degradation                                                 | 42   | -1.81 | 0.04  |
| KEGG       | DNA replication                                                    | 33   | -1.83 | 0.04  |
| KEGG       | Cysteine and methionine metabolism                                 | 33   | -1.89 | 0.04  |
| KEGG       | Nucleotide excision repair                                         | 39   | -1.77 | 0.05  |
| KEGG       | Histidine metabolism                                               | 27   | -1.74 | 0.05  |
| GO:BP      | RNA secondary structure unwinding                                  | 38   | -2.25 | 0.002 |
| GO:MF      | Lysine acetylated histone binding                                  | 15   | -1.93 | 0.05  |
